# Supplementary material for: Isolation and characterization of Corynebacterium spp. from bulk tank raw cow's milk of different dairy farms in Germany
Source: PubMed Central journal article supplement (PMC5884509; doi:10.1371/journal.pone.0194365), 2018-04-04
Supplement: pone.0194365.s001.pdf [file pone.0194365.s001.pdf]

**S1 Table. Accession numbers of the sequences used in this study.**

| Strains           | GenBank Accession numbers |                          |
|-------------------|---------------------------|--------------------------|
|                   | 16S rRNA                  | <i>rpoB</i> <sup>c</sup> |
| JZ1               | KX359581 <sup>b</sup>     | KY013617                 |
| JZ2               | KU252651 <sup>a</sup>     | KU298439                 |
| JZ3               | KU252652 <sup>a</sup>     | KU298440                 |
| JZ4               | KX359591 <sup>b</sup>     | KY013618                 |
| JZ5               | KX359592 <sup>b</sup>     | -                        |
| JZ6               | KU252653 <sup>a</sup>     | KU870633                 |
| JZ10              | KX359583 <sup>b</sup>     | KX965686                 |
| JZ11              | KX359582 <sup>b</sup>     | KX965687                 |
| JZ13              | KU252654 <sup>a</sup>     | KU870634                 |
| JZ14              | KU252655 <sup>a</sup>     | KU870629                 |
| JZ15              | KU252656 <sup>a</sup>     | KU298442                 |
| JZ16 <sup>T</sup> | KR534194 <sup>a</sup>     | KU298441                 |
| JZ19              | KX359590 <sup>b</sup>     | -                        |
| JZ20              | KU252657 <sup>a</sup>     | KU870630                 |
| JZ21              | KX359584 <sup>b</sup>     | KX965688                 |
| JZ22              | KX359589 <sup>b</sup>     | KX965689                 |
| JZ23              | KX359586 <sup>b</sup>     | KX965690                 |
| JZ25              | KU252658 <sup>a</sup>     | KU870631                 |
| JZ26              | KX359585 <sup>b</sup>     | KX965691                 |
| JZ27              | KU252659 <sup>a</sup>     | KU870632                 |
| JZ28              | KX359588 <sup>b</sup>     | KX965692                 |
| JZ29              | KX359587 <sup>b</sup>     | KX965693                 |
| JZ32              | KX359593 <sup>b</sup>     | KX965694                 |
| JZ34              | KX359594 <sup>b</sup>     | KX965695                 |
| JZ36              | KX359595 <sup>b</sup>     | KX965696                 |
| N1                | KU252662 <sup>a</sup>     | KU298443                 |
| FF1               | KU252600 <sup>a</sup>     | KX965697                 |
| FF3               | KU252661 <sup>a</sup>     | KX965698                 |

<sup>a</sup> Complete 16S rRNA gene sequences (1,400 – 1,500 bp).

<sup>b</sup> Partial 16S rRNA gene sequences (600 – 800 bp).

<sup>c</sup> Partial *rpoB* gene sequences (300 – 400 bp).
